# Supplementary material for: The influence of plant species richness on stress recovery of humans
Source: Copernicus journal article supplement (doi:10.5194/we-18-121-2018), 2018-08-29
Supplement: Supplementary file 1 [file we-18-121-2018-supplement.zip]

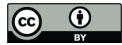

## *Supplement of*

# **The influence of plant species richness on stress recovery of humans**

**Petra Lindemann-Matthies and Diethart Matthies**

*Correspondence to:* Petra Lindemann-Matthies ([petra.lindemann-matthies@ph-karlsruhe.de](mailto:petra.lindemann-matthies@ph-karlsruhe.de))

- [we-18-121-2018-supplement-title-page.pdf](#)
- [Data Lindemann-Matthies.dat](#)

The copyright of individual parts of the supplement might differ from the CC BY 4.0 License.
