# Supplementary material for: The influence of plant species richness on stress recovery of humans
Source: Copernicus journal article supplement (doi:10.5194/we-18-121-2018), 2018-08-29
Supplement: Supplementary file 2 [file we-18-121-2018-supplement.zip]

Archive with 2 entries (2 files):
- Data Lindemann-Matthies.dat
- we-18-121-2018-supplement-title-page.pdf
