# Supplementary material for: The influence of plant species richness on stress recovery of humans
Source: Copernicus journal article supplement (doi:10.5194/we-18-121-2018), 2018-08-29
Supplement: Supplementary file 2 [file we-18-121-2018-supplement.zip › Data Lindemann-Matthies.dat]

Number	Combination	Code	SpecNumber	SpecNumberQuad	Age	Gender	Natureattachment	SysBPstressed	SysBPrelaxed	diff.SysBP	DiaBPstressed	DiaBPrelaxed	ProzHerbs
1	PapaverMono	1	1	1	35	0	6.8	103	115	-12	57	79	100
2	PapaverMono	1	1	1	53	0	9.7	123	116	7	86	77	100
3	PapaverMono	1	1	1	18	0	8.6	118	109	9	70	67	100
4	PapaverMono	1	1	1	42	1	6.9	154	140	14	96	96	100
5	PapaverMono	1	1	1	23	0	8.3	126	129	-3	92	87	100
6	PapaverMono	1	1	1	25	1	6.4	146	135	11	104	88	100
7	PapaverMono	1	1	1	61	0	10	126	114	12	89	85	100
8	PapaverMono	1	1	1	79	0	9.2	148	134	14	81	74	100
9	PapaverMono	1	1	1	78	0	7.2	155	134	21	90	86	100
10	PapaverMono	1	1	1	42	1	7.5	143	139	4	95	91	100
11	CentcyanMono	2	1	1	31	1	8.3	139	129	10	84	79	100
12	CentcyanMono	2	1	1	26	0	8.9	126	120	6	84	84	100
13	CentcyanMono	2	1	1	23	0	8.1	131	133	-2	89	93	100
14	CentcyanMono	2	1	1	23	1	7	132	128	4	88	84	100
15	CentcyanMono	2	1	1	31	1	4.7	144	138	6	95	91	100
16	CentcyanMono	2	1	1	33	0	6.7	144	147	-3	84	85	100
17	CentcyanMono	2	1	1	52	1	10	132	139	-7	98	98	100
18	CentcyanMono	2	1	1	44	1	8.4	144	126	18	91	85	100
19	CentcyanMono	2	1	1	42	0	8.6	130	121	9	84	78	100
20	CentcyanMono	2	1	1	41	0	10	126	121	5	91	88	100
21	BrizaMedia	3	1	1	26	0	8.6	132	127	5	86	80	0
22	BrizaMedia	3	1	1	55	1	8.5	177	161	16	94	96	0
23	BrizaMedia	3	1	1	68	0	10	146	133	13	77	75	0
24	BrizaMedia	3	1	1	77	1	9.2	150	139	11	97	79	0
25	BrizaMedia	3	1	1	24	1	7.8	124	129	-5	81	84	0
26	BrizaMedia	3	1	1	32	1	8.4	136	137	-1	91	92	0
27	BrizaMedia	3	1	1	65	0	9.5	145	144	1	89	86	0
28	BrizaMedia	3	1	1	78	0	10	102	120	-18	58	67	0
29	BrizaMedia	3	1	1	65	0	9	132	127	5	80	80	0
30	BrizaMedia	3	1	1	65	0	10	120	110	10	77	75	0
31	BrizaMedia	3	1	1	68	1	8.4	136	142	-6	76	78	0
32	BrizaMedia	3	1	1	52	1	8.5	121	122	-1	73	75	0
33	BrizaMedia	3	1	1	78	0	9.4	136	121	15	70	67	0
34	BrizaMedia	3	1	1	48	1	8	131	128	3	96	97	0
35	LoliumPerenne	4	1	1	52	1	10	139	157	-18	82	104	0
36	LoliumPerenne	4	1	1	31	1	9.4	168	144	24	119	108	0
37	LoliumPerenne	4	1	1	18	1	6.3	130	127	3	69	64	0
38	LoliumPerenne	4	1	1	34	0	9.5	114	106	8	75	69	0
39	LoliumPerenne	4	1	1	18	0	9.4	109	112	-3	74	69	0
40	LoliumPerenne	4	1	1	53	0	9	117	105	12	73	70	0
41	LoliumPerenne	4	1	1	67	0	8.2	124	124	0	81	79	0
42	LoliumPerenne	4	1	1	26	0	8.3	116	107	9	80	73	0
43	LoliumPerenne	4	1	1	75	0	8.3	132	129	3	97	74	0
44	LoliumPerenne	4	1	1	40	1	3.5	137	131	6	81	81	0
45	LoliumPerenne	4	1	1	60	0	10	129	125	4	81	74	0
46	LoliumPerenne	4	1	1	75	0	5.3	142	144	-2	98	98	0
47	LoliumPerenne	4	1	1	24	0	8.3	118	113	5	67	69	0
48	15grasses,1herb	5	16	256	33	0	10	121	124	-3	81	81	6.25
49	15grasses,1herb	5	16	256	33	0	9.7	131	117	14	86	85	6.25
50	15grasses,1herb	5	16	256	27	0	6.5	123	122	1	79	76	6.25
51	15grasses,1herb	5	16	256	62	1	5.8	111	92	19	91	85	6.25
52	15grasses,1herb	5	16	256	40	0	10	141	137	4	94	95	6.25
53	15grasses,1herb	5	16	256	46	0	10	102	113	-11	69	73	6.25
54	15grasses,1herb	5	16	256	45	1	7.1	123	124	-1	79	79	6.25
55	15grasses,1herb	5	16	256	39	0	9.2	98	102	-4	58	64	6.25
56	15grasses,1herb	5	16	256	18	0	6	113	123	-10	71	78	6.25
57	15grasses,1herb	5	16	256	26	0	9.6	108	108	0	72	64	6.25
58	15grasses,1herb	5	16	256	51	1	9.7	139	136	3	90	85	6.25
59	15grasses,1herb	5	16	256	52	0	9.4	138	136	2	85	80	6.25
60	15grasses,1herb	5	16	256	32	1	6.7	121	115	6	76	73	6.25
61	8grasses,8herbs	6	16	256	62	1	8.6	131	128	3	82	77	50
62	8grasses,8herbs	6	16	256	50	0	8.4	109	109	0	70	70	50
63	8grasses,8herbs	6	16	256	26	0	7.3	117	106	11	82	71	50
64	8grasses,8herbs	6	16	256	43	0	10	126	118	8	78	72	50
65	8grasses,8herbs	6	16	256	70	0	10	138	132	6	81	79	50
66	8grasses,8herbs	6	16	256	68	1	6.5	131	126	5	78	80	50
67	8grasses,8herbs	6	16	256	29	1	8.9	118	109	9	72	69	50
68	8grasses,8herbs	6	16	256	45	1	7.2	105	103	2	63	52	50
69	8grasses,8herbs	6	16	256	83	0	8.9	129	135	-6	69	74	50
70	8grasses,8herbs	6	16	256	87	0	9.4	138	139	-1	66	65	50
71	8grasses,8herbs	6	16	256	60	0	7	124	115	9	80	74	50
72	8grasses,8herbs	6	16	256	41	1	7.5	118	102	16	72	63	50
73	8grasses,8herbs	6	16	256	69	0	7.6	112	110	2	64	69	50
74	8grasses,8herbs	6	16	256	63	1	8.8	124	125	-1	82	74	50
75	8grasses,8herbs	6	16	256	47	0	7.9	117	120	-3	78	84	50
76	8grasses,8herbs	6	16	256	48	0	4.5	132	118	14	88	87	50
77	8grasses,8herbs	6	16	256	43	0	6.4	103	100	3	66	64	50
78	8grasses,8herbs	6	16	256	50	0	7.7	141	138	3	87	86	50
79	8grasses,8herbs	6	16	256	41	1	8.4	108	108	0	76	76	50
80	8grasses,8herbs	6	16	256	27	1	8.4	127	129	-2	80	94	50
81	12grasses,20herbs	7	32	1024	18	0	6.6	120	116	4	75	69	62.5
82	12grasses,20herbs	7	32	1024	20	1	1	151	138	13	94	87	62.5
83	12grasses,20herbs	7	32	1024	85	0	8	107	98	9	64	60	62.5
84	12grasses,20herbs	7	32	1024	72	0	10	133	130	3	84	85	62.5
85	12grasses,20herbs	7	32	1024	56	0	9.5	120	113	7	75	69	62.5
86	12grasses,20herbs	7	32	1024	35	0	8	127	120	7	83	80	62.5
87	12grasses,20herbs	7	32	1024	38	1	5.9	143	133	10	91	87	62.5
88	12grasses,20herbs	7	32	1024	36	1	6	129	125	4	90	90	62.5
89	12grasses,20herbs	7	32	1024	37	1	8.2	133	127	6	86	84	62.5
90	12grasses,20herbs	7	32	1024	62	0	8.2	125	125	0	96	93	62.5
91	12grasses,20herbs	7	32	1024	69	1	7.4	136	126	10	76	77	62.5
92	12grasses,20herbs	7	32	1024	61	0	8.3	127	131	-4	81	85	62.5
93	9grasses,23herbs	8	32	1024	39	0	5.7	124	122	2	84	80	71.875
94	9grasses,23herbs	8	32	1024	62	1	8.8	166	153	13	104	104	71.875
95	9grasses,23herbs	8	32	1024	34	1	9.5	129	129	0	92	95	71.875
96	9grasses,23herbs	8	32	1024	27	1	8.9	128	122	6	93	86	71.875
97	9grasses,23herbs	8	32	1024	66	0	10	148	126	22	86	84	71.875
98	9grasses,23herbs	8	32	1024	67	0	9	138	122	16	82	79	71.875
99	9grasses,23herbs	8	32	1024	28	1	9.6	142	143	-1	105	100	71.875
100	9grasses,23herbs	8	32	1024	67	0	10	138	130	8	95	91	71.875
101	9grasses,23herbs	8	32	1024	34	0	9.4	115	119	-4	85	81	71.875
102	9grasses,23herbs	8	32	1024	49	0	8.4	137	131	6	92	89	71.875
103	9grasses,23herbs	8	32	1024	37	1	7.6	153	142	11	102	98	71.875
104	9grasses,23herbs	8	32	1024	55	0	9.9	130	108	22	83	79	71.875
105	9grasses,23herbs	8	32	1024	41	0	9.3	130	117	13	96	83	71.875
106	9grasses,23herbs	8	32	1024	31	1	6.1	130	133	-3	92	95	71.875
107	9grasses,23herbs	8	32	1024	33	0	9.9	127	125	2	92	85	71.875
108	9grasses,23herbs	8	32	1024	64	0	9.7	151	132	19	98	85	71.875
109	9grasses,23herbs	8	32	1024	37	0	9.8	136	125	11	81	82	71.875
110	9grasses,23herbs	8	32	1024	68	0	9.5	145	138	7	86	85	71.875
111	9grasses,23herbs	8	32	1024	46	0	10	151	161	-10	107	114	71.875
112	17grasses,47herbs	9	64	4096	25	0	6.6	127	128	-1	82	79	73.4375
113	17grasses,47herbs	9	64	4096	18	0	10	123	117	6	78	57	73.4375
114	17grasses,47herbs	9	64	4096	33	1	7	149	151	-2	105	102	73.4375
115	17grasses,47herbs	9	64	4096	31	0	8.8	105	100	5	63	63	73.4375
116	17grasses,47herbs	9	64	4096	70	0	10	144	126	18	84	79	73.4375
117	17grasses,47herbs	9	64	4096	34	0	9.4	150	134	16	84	87	73.4375
118	17grasses,47herbs	9	64	4096	46	1	8.3	124	127	-3	91	90	73.4375
119	17grasses,47herbs	9	64	4096	51	0	9.7	136	130	6	78	78	73.4375
120	17grasses,47herbs	9	64	4096	45	0	10	110	110	0	68	68	73.4375
121	17grasses,47herbs	9	64	4096	62	0	8.4	116	112	4	68	67	73.4375
122	17grasses,47herbs	9	64	4096	30	1	8.3	138	132	6	92	86	73.4375
123	17grasses,47herbs	9	64	4096	64	1	9.1	159	164	-5	110	107	73.4375
124	17grasses,47herbs	9	64	4096	32	1	7.4	119	119	0	81	83	73.4375
125	17grasses,47herbs	9	64	4096	36	0	9.4	114	110	4	73	70	73.4375
126	17grasses,47herbs	9	64	4096	41	1	4.8	133	143	-10	93	95	73.4375
127	17grasses,47herbs	9	64	4096	65	1	8.7	125	132	-7	78	77	73.4375
128	17grasses,47herbs	9	64	4096	31	1	7.7	140	145	-5	99	96	73.4375
129	15grasse,49herbs	10	64	4096	41	0	10	128	139	-11	90	90	76.5625
130	15grasse,49herbs	10	64	4096	27	1	10	129	122	7	85	81	76.5625
131	15grasse,49herbs	10	64	4096	55	1	7.2	123	119	4	81	80	76.5625
132	15grasse,49herbs	10	64	4096	58	0	9.2	141	139	2	94	90	76.5625
133	15grasse,49herbs	10	64	4096	69	0	8.4	135	138	-3	85	86	76.5625
134	15grasse,49herbs	10	64	4096	55	0	9	135	137	-2	84	78	76.5625
135	15grasse,49herbs	10	64	4096	50	1	10	147	148	-1	104	104	76.5625
136	15grasse,49herbs	10	64	4096	41	1	8	129	133	-4	91	97	76.5625
137	15grasse,49herbs	10	64	4096	60	0	9.5	143	134	9	82	84	76.5625
138	15grasse,49herbs	10	64	4096	66	0	10	137	140	-3	93	94	76.5625
139	15grasse,49herbs	10	64	4096	29	0	8.2	156	138	18	105	92	76.5625
140	15grasse,49herbs	10	64	4096	56	0	9.3	126	140	-14	80	88	76.5625
141	15grasse,49herbs	10	64	4096	66	1	10	128	122	6	86	83	76.5625
142	15grasse,49herbs	10	64	4096	50	0	10	126	126	0	88	86	76.5625
143	15grasse,49herbs	10	64	4096	41	0	9.8	148	141	7	96	90	76.5625
144	15grasse,49herbs	10	64	4096	24	0	3.2	134	127	7	82	80	76.5625
145	15grasse,49herbs	10	64	4096	60	0	10	133	132	1	73	86	76.5625
146	15grasse,49herbs	10	64	4096	45	0	9.9	115	125	-10	85	92	76.5625
147	15grasse,49herbs	10	64	4096	78	1	9.9	182	169	13	98	94	76.5625
148	15grasse,49herbs	10	64	4096	42	0	10	138	141	-3	82	92	76.5625
149	15grasse,49herbs	10	64	4096	27	1	10	139	134	5	89	87	76.5625
150	15grasse,49herbs	10	64	4096	36	0	10	139	145	-6	99	104	76.5625
151	15grasse,49herbs	10	64	4096	22	1	8.3	144	136	8	94	91	76.5625
152	15grasse,49herbs	10	64	4096	38	0	8.2	141	144	-3	102	103	76.5625
153	control	11	0	0	29	1	7.6	118	117	1	81	83	0
154	control	11	0	0	78	0	6.2	144	140	4	87	88	0
155	control	11	0	0	50	0	9.7	110	123	-13	94	90	0
156	control	11	0	0	65	0	10	125	127	-2	83	79	0
157	control	11	0	0	76	1	9.2	170	172	-2	87	93	0
158	control	11	0	0	18	0	7.3	108	106	2	69	71	0
159	control	11	0	0	27	1	1.9	122	128	-6	82	83	0
160	control	11	0	0	28	0	7.1	120	115	5	86	76	0
161	control	11	0	0	32	1	8	118	114	4	75	73	0
162	control	11	0	0	53	0	7.2	117	127	-10	85	84	0
163	control	11	0	0	49	0	10	107	106	1	71	69	0
164	control	11	0	0	28	0	7	107	109	-2	66	68	0
165	control	11	0	0	27	1	8.4	133	123	10	81	80	0
166	control	11	0	0	45	0	10	110	114	-4	72	73	0
167	control	11	0	0	49	0	7.4	122	124	-2	76	78	0
168	control	11	0	0	48	0	8.4	151	144	7	108	104	0
169	control	11	0	0	30	0	7.6	107	108	-1	75	74	0
170	control	11	0	0	26	0	9.3	122	116	6	82	79	0
171	control	11	0	0	33	1	8	115	110	5	74	69	0
